# Supplementary material for: Phenotypic characterization and analysis of complete genomes of two distinct strains of the proposed species “L. swaminathanii”
Source: PubMed Central journal article supplement (PMC9159981; doi:10.1038/s41598-022-13119-y), 2022-06-01
Supplement: 41598_2022_13119_MOESM1_ESM.pdf [file 41598_2022_13119_MOESM1_ESM.pdf]

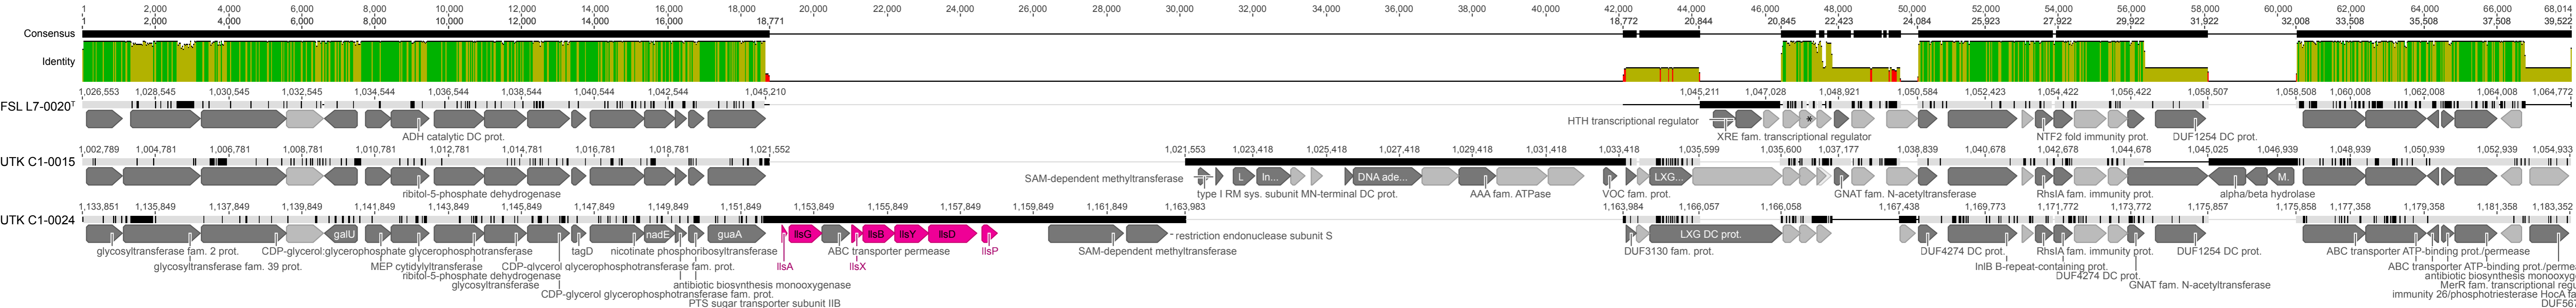

**Supplementary Figure S1.** *Listeria* pathogenicity island 3 (LIPI-3) in UTK C1-0024

Region of the whole-genome alignment (Figure 1) that contains LIPI-3 (CDS in pink). CDS annotated as hypothetical proteins are light gray and all others are dark gray.
